# Supplementary material for: Anti‐inflammatory Effects of S. cumini Seed Extract on Gelatinase‐B (MMP‐9) Regulation against Hyperglycemic Cardiomyocyte Stress
Source: Hindawi journal article supplement (doi:10.1155/2021/8839479), 2021-01-01

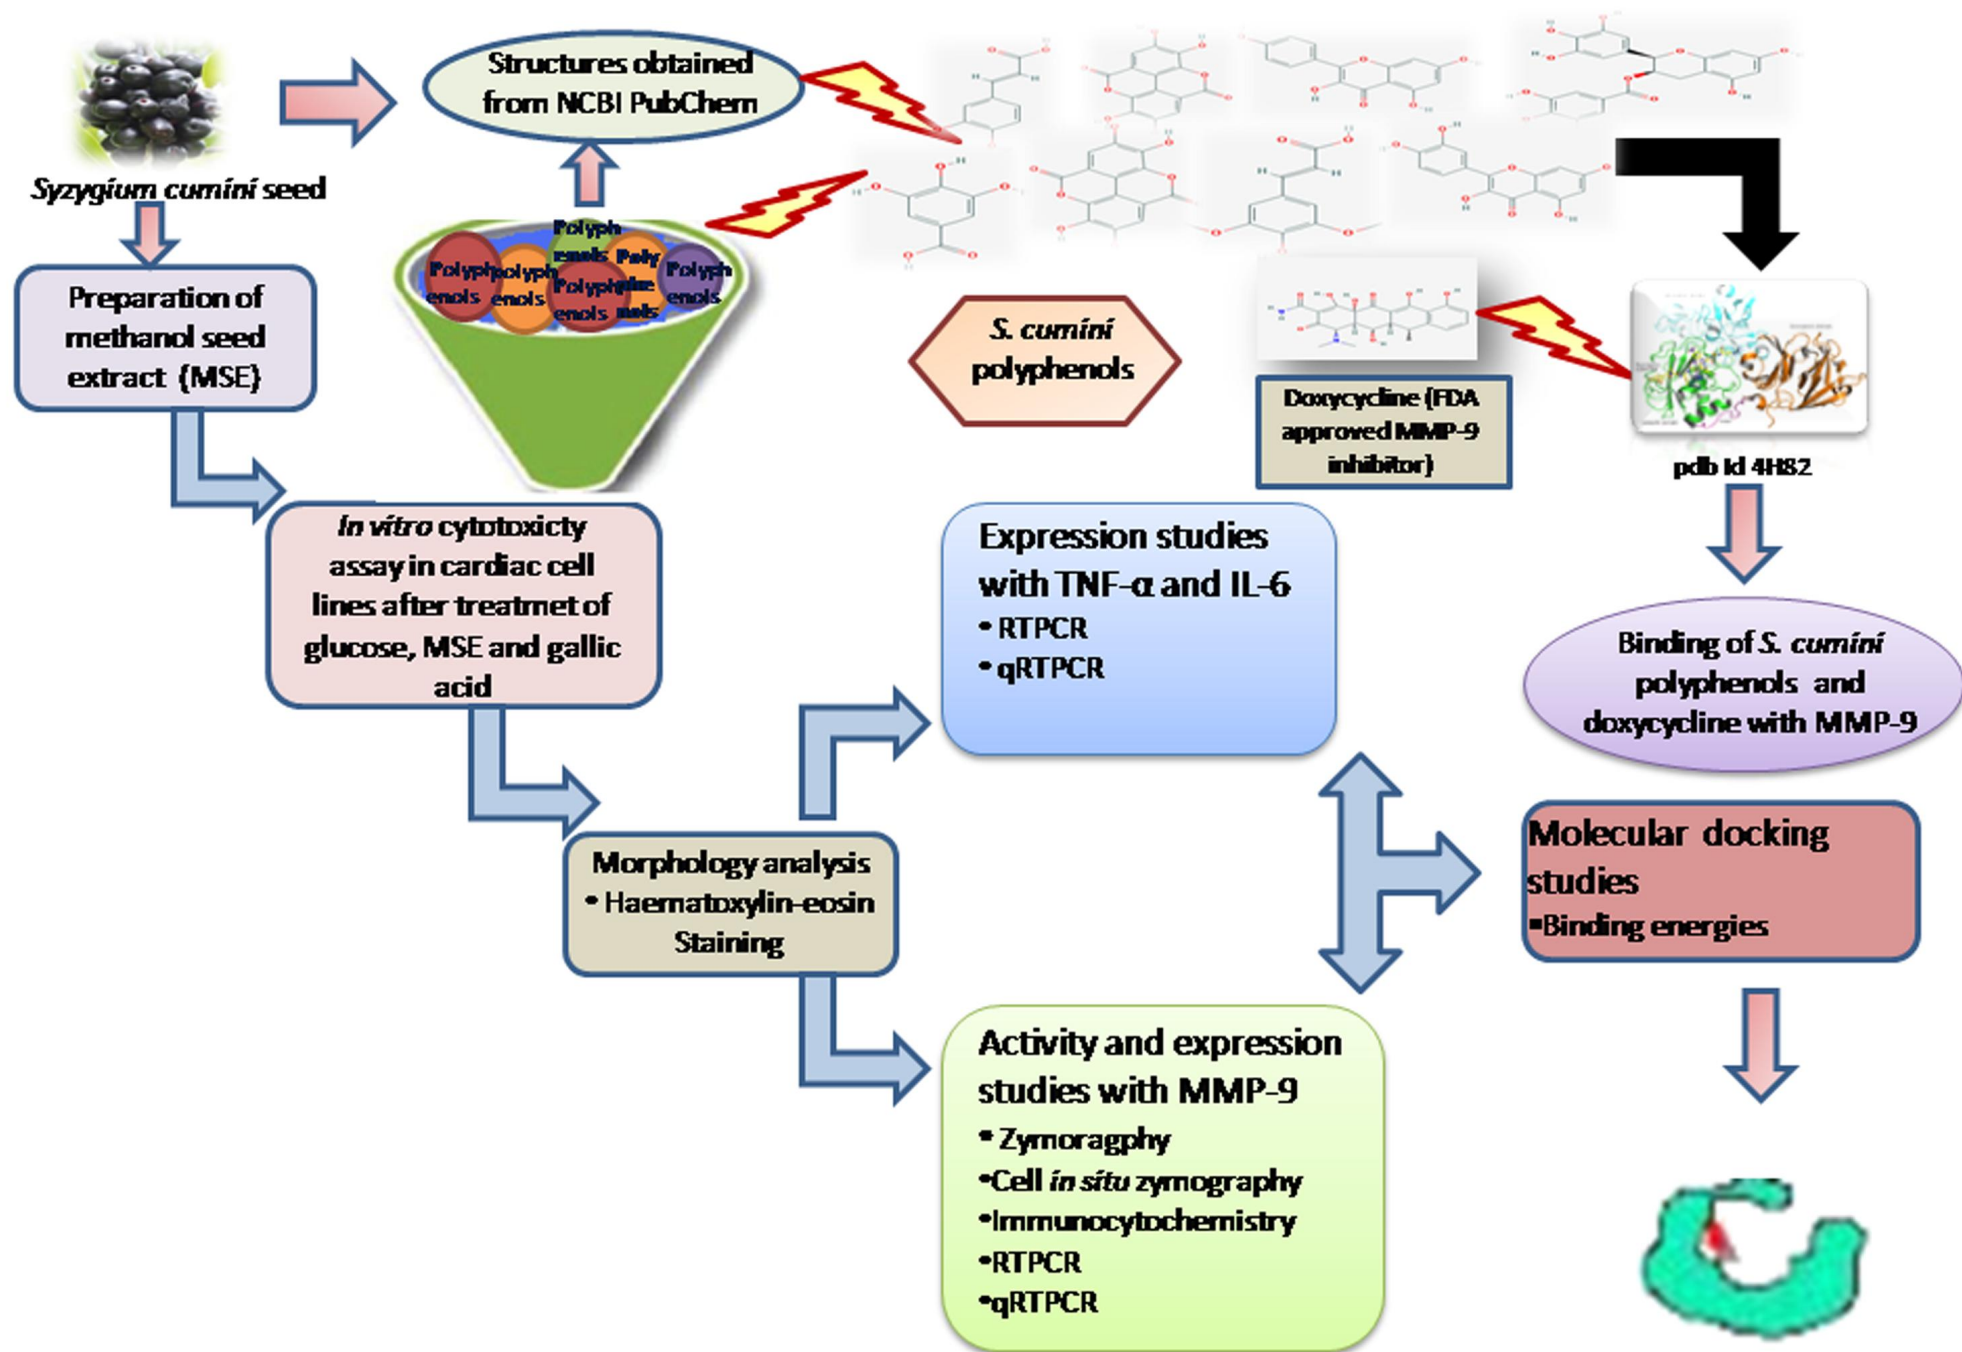

Supplement: f2 [file 8839479.f2.pdf]
