# Supplementary material for: Anti‐inflammatory Effects of S. cumini Seed Extract on Gelatinase‐B (MMP‐9) Regulation against Hyperglycemic Cardiomyocyte Stress
Source: Hindawi journal article supplement (doi:10.1155/2021/8839479), 2021-01-01
Supplement: f3 [file 8839479.f3.pdf]

| S. No | Compounds identified and their Structure                                                                          | Retention time | Quantity (mg/100g of dry weight) |
|-------|-------------------------------------------------------------------------------------------------------------------|----------------|----------------------------------|
| 1.    | 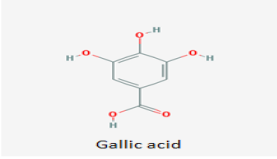 <p>Gallic acid</p>              | 6.398          | 53.0±0.06                        |
| 2.    |  <p>p-Coumaric acid</p>          | 6.793          | 71.9±0.05                        |
| 3.    |  <p>Quercetin</p>                | 7.281          | 29.6±0.05                        |
| 4.    |  <p>Protocatechuic acid</p>      | 6.247          | 40.6±0.10                        |
| 5.    |  <p>Sinapic acid</p>           | 4.949          | 30.8±0.14                        |
| 6.    |  <p>Caffeic acid</p>           | 4.843          | 15.8±0.03                        |
| 7.    |  <p>Kaempferol</p>             | 7.712          | 10.2±0.09                        |
| 8.    |  <p>Ferulic acid</p>           | 8.859          | 2.71±0.02                        |
| 9.    |  <p>p-Hydroxy benzoic acid</p> | 6.688          | 0.52±0.04                        |

10.

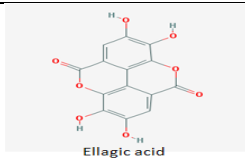

3.894

5.8±0.09
